# Supplementary material for: Phylogeny and the inference of evolutionary trajectories
Source: PubMed Central journal article supplement (PMC4085962; doi:10.1093/jxb/eru118), 2014-04-22
Supplement: supp_eru118_Supplemental_tables_final.pdf [file supp_eru118_Supplemental_tables_final.pdf]

**Supplemental Table S1.** Ordered Q matrices.

| <b>Matrix 1</b> | State 1 | State 2 | State 3 | State 4 |
|-----------------|---------|---------|---------|---------|
| State 1         | -1      | 1       | 0       | 0       |
| State 2         | 1       | -2      | 1       | 0       |
| State 3         | 0       | 1       | -2      | 1       |
| State 4         | 0       | 0       | 1       | -1      |

| <b>Matrix 2</b> | State 1 | State 2 | State 3 | State 4 |
|-----------------|---------|---------|---------|---------|
| State 1         | -1      | 1       | 0       | 0       |
| State 2         | 0       | -1      | 1       | 0       |
| State 3         | 0       | 0       | -1      | 1       |
| State 4         | 0       | 0       | 0       | 0       |

| <b>Matrix 3</b> | State 1 | State 2 | State 3 | State 4 |
|-----------------|---------|---------|---------|---------|
| State 1         | -2      | 2       | 0       | 0       |
| State 2         | 1       | -4      | 3       | 0       |
| State 3         | 0       | 2       | -3      | 1       |
| State 4         | 0       | 0       | 3       | -3      |

| <b>Matrix 4</b> | State 1 | State 2 | State 3 | State 4 |
|-----------------|---------|---------|---------|---------|
| State 1         | -2      | 2       | 0       | 0       |
| State 2         | 0       | -3      | 3       | 0       |
| State 3         | 0       | 0       | -1      | 1       |
| State 4         | 0       | 0       | 0       | 0       |

| <b>Matrix 5</b> | State 1 | State 2 | State 3 | State 4 |
|-----------------|---------|---------|---------|---------|
| State 1         | -1      | 1       | 0       | 0       |
| State 2         | 1       | -3      | 2       | 0       |
| State 3         | 0       | 2       | -3      | 1       |
| State 4         | 0       | 0       | 1       | -1      |

| <b>Matrix 6</b> | State 1 | State 2 | State 3 | State 4 |
|-----------------|---------|---------|---------|---------|
| State 1         | -1      | 1       | 0       | 0       |
| State 2         | 0       | -2      | 2       | 0       |
| State 3         | 0       | 0       | -1      | 1       |
| State 4         | 0       | 0       | 0       | 0       |

| <b>Matrix 7</b> | State 1 | State 2 | State 3 | State 4 |
|-----------------|---------|---------|---------|---------|
| State 1         | -1      | 1       | 0       | 0       |
| State 2         | 1       | -2      | 1       | 0       |
| State 3         | 0       | 1       | -4      | 3       |
| State 4         | 0       | 0       | 1       | -1      |

| <b>Matrix 8</b> | State 1 | State 2 | State 3 | State 4 |
|-----------------|---------|---------|---------|---------|
| State 1         | -1      | 1       | 0       | 0       |
| State 2         | 0       | -1      | 1       | 0       |
| State 3         | 0       | 0       | -3      | 3       |
| State 4         | 0       | 0       | 0       | 0       |

**Supplemental Table S2.** Unordered Q matrices

| <b>Matrix 1</b> | State 1 | State 2 | State 3 | State 4 |
|-----------------|---------|---------|---------|---------|
| State 1         | -3      | 1       | 1       | 1       |
| State 2         | 1       | -3      | 1       | 1       |
| State 3         | 1       | 1       | -3      | 1       |
| State 4         | 1       | 1       | 1       | -3      |

| <b>Matrix 2</b> | State 1 | State 2 | State 3 | State 4 |
|-----------------|---------|---------|---------|---------|
| State 1         | -3      | 1       | 1       | 1       |
| State 2         | 0       | -2      | 1       | 1       |
| State 3         | 0       | 0       | -1      | 1       |
| State 4         | 0       | 0       | 0       | 0       |

| <b>Matrix 3</b> | State 1 | State 2 | State 3 | State 4 |
|-----------------|---------|---------|---------|---------|
| State 1         | -5      | 2       | 1       | 2       |
| State 2         | 1       | -5      | 3       | 1       |
| State 3         | 2       | 2       | -7      | 3       |
| State 4         | 1       | 1       | 3       | -4      |

| <b>Matrix 4</b> | State 1 | State 2 | State 3 | State 4 |
|-----------------|---------|---------|---------|---------|
| State 1         | -5      | 2       | 1       | 2       |
| State 2         | 0       | -4      | 3       | 1       |
| State 3         | 0       | 0       | -3      | 3       |
| State 4         | 0       | 0       | 0       | 0       |

| <b>Matrix 5</b> | State 1 | State 2 | State 3 | State 4 |
|-----------------|---------|---------|---------|---------|
| State 1         | -6      | 1       | 2       | 3       |
| State 2         | 1       | -5      | 2       | 2       |
| State 3         | 2       | 2       | -5      | 1       |
| State 4         | 3       | 2       | 1       | -6      |

| <b>Matrix 6</b> | State 1 | State 2 | State 3 | State 4 |
|-----------------|---------|---------|---------|---------|
| State 1         | -6      | 1       | 2       | 3       |
| State 2         | 0       | -4      | 2       | 2       |
| State 3         | 0       | 0       | -1      | 1       |
| State 4         | 0       | 0       | 0       | 0       |

| <b>Matrix 7</b> | State 1 | State 2 | State 3 | State 4 |
|-----------------|---------|---------|---------|---------|
| State 1         | -5      | 1       | 1       | 3       |
| State 2         | 1       | -5      | 1       | 3       |
| State 3         | 1       | 1       | -5      | 3       |
| State 4         | 1       | 1       | 1       | -3      |

| <b>Matrix 8</b> | State 1 | State 2 | State 3 | State 4 |
|-----------------|---------|---------|---------|---------|
| State 1         | -5      | 1       | 1       | 3       |
| State 2         | 0       | -4      | 1       | 3       |
| State 3         | 0       | 0       | -3      | 3       |
| State 4         | 0       | 0       | 0       | 0       |
